# Supplementary material
Source: MDPI journal article supplement (https://www.mdpi.com/2313-0105/9/10/503)
Supplement: s1 [file s1]

Archive with 1 entries (1 files):
- batteries-2630837-supplementary.pdf
